# Supplementary material
Source: Research Square preprint supplement (doi:10.21203/rs.3.rs-8917541/v1)
Supplement: Supplementary file 1 [file b57012c3671c27c3fb550a33.docx]

**Supplementary Table 2.** Interaction between Mediterranean Diet Score and diabetes status on body composition, anthropometric and biochemical outcomes.

| **Outcomes** | **Unadjusted β (95% CI)** | **p-value** | **Model 1a β (95% CI)** | **p-value** |
| --- | --- | --- | --- | --- |
| Total fat mass (kg) | -0.11 (-4.04, 3.81) | 0.955 | -1.00 (-4.92, 2.92) | 0.613 |
| Percentage body fat (%) | -1.47 (-3.90, 0.96) | 0.234 | -1.16 (-2.71, 0.40) | 0.144 |
| Soft tissue lean mass (kg) | 2.70 (-1.61, 7.01) | 0.217 | 0.98 (-1.60, 3.55) | 0.454 |
| Visceral fat mass (g) | 8.91 (-124.05, 141.87) | 0.895 | -17.55 (-149.37, 114.27) | 0.792 |
| Weight (kg) | 2.56 (-3.91, 9.05) | 0.435 | -0.07 (-5.98, 5.83) | 0.981 |
| BMI (kg/m²) | -0.58 (-2.39, 1.23) | 0.526 | -0.99 (-2.84, 0.86) | 0.290 |
| Waist circumference (cm) | -0.02 (-0.07, 0.04) | 0.545 | -0.02 (-0.08, 0.03) | 0.341 |
| Waist-to-hip ratio | 0.003 (-0.02, 0.03) | 0.823 | -0.001 (-0.02, 0.02) | 0.945 |
| Glucose (mmol/L) | -0.23 (-0.69, 0.23) | 0.324 | -0.28 (-0.75, 0.20) | 0.254 |
| HbA1c (mmol/mol) | 0.05 (-0.17, 0.27) | 0.661 | 0.06 (-0.17, 0.28) | 0.625 |
| Insulin (µU /mL) | -1.05 (-3.63, 1.52) | 0.420 | -1.07 (-3.70, 1.56) | 0.424 |
| HOMA-IR | -0.48 (-1.40, 0.43) | 0.296 | -0.50 (-1.44, 0.45) | 0.299 |
| Cholesterol (mmol/L) | 0.26 (-0.22, 0.73) | 0.291 | 0.19 (-0.29, 0.66) | 0.439 |
| Triglycerides (mmol/L) | 0.12 (-0.137, 0.38) | 0.357 | 0.12 (-0.16, 0.37) | 0.438 |
| LDL (mmol/L) | 0.19 (-0.23, 0.60) | 0.369 | 0.12 (-0.30, 0.54) | 0.571 |
| HDL (mmol/L) | 0.03 (-0.11, 0.17) | 0.667 | 0.03 (-0.01, 0.16) | 0.653 |
| SBP (mmHg) | 0.35 (-6.42, 7.11) | 0.919 | -0.39 (-7.47, 6.68) | 0.912 |
| DBP (mmHg) | 2.73 (-1.75, 7.22) | 0.230 | 1.68 (-2.94, 6.30) | 0.473 |

Unadjusted; a Model 1: adjusted for age and sex, * Significant at p < 0.05. Abbreviations: β, regression coefficient; CI, confidence interval; BMI, body mass index; SBP, systolic blood pressure; DBP, diastolic blood pressure; HbA1c, glycated haemoglobin A1C; HOMA-IR, homeostatic model assessment for insulin resistance; HDL, high-density lipoprotein; LDL, low-density lipoprotein.
