# Supplementary material
Source: Research Square preprint supplement (doi:10.21203/rs.3.rs-8917541/v1)
Supplement: Supplementary file 2 [file eed0c2823b8fa9a6da05c44a.docx]

**Supplementary Table 1.** Associations between individual food groups scores and body composition, anthropometric, haemodynamic, biochemical outcomes.

| **Food Group** | **Model 1a** | | **Model 2b** | | | **Effect** |
| --- | --- | --- | --- | --- | --- | --- |
| **Body Composition outcomes** | | | | | | |
|  | **β (95% CI)** | **p-value** | **β (95% CI)** | **p-value** | | **Total fat mass (kg)** |
| **Grains** | 0.69 (-0.62, 2.00) | 0.297 | 0.52 (-0.76, 1.80) | 0.420 | | - |
| **Vegetables** | -0.69 (-2.07, 0.70) | 0.329 | -0.15 (-1.56, 1.25) | 0.828 | | - |
| **Potatoes** | -0.16 (-1.15, 0.82) | 0.742 | -0.09 (-1.06, 0.89) | 0.860 | | - |
| **Fruit** | 0.49 (-0.83, 1.81) | 0.467 | 0.71 (-0.58, 2.00) | 0.276 | | - |
| **Dairy** | -0.24 (-1.85, 1.36) | 0.765 | -0.19 (-1.87, 1.48) | 0.819 | | - |
| **Fish** | -0.32 (-1.25, 0.61) | 0.494 | -0.19 (-1.10, 0.72) | 0.677 | | - |
| **Poultry** | -0.08 (-1.21, 1.05) | 0.887 | -0.04 (-1.17, 1.09) | 0.943 | | - |
| **Red Meat** | 0.09 (-0.88, 1.07) | 0.851 | -0.06 (-1.03, 0.91) | 0.904 | | - |
| **Legumes** | 0.76 (-0.51, 2.02) | 0.238 | 0.66 (-0.66, 1.98) | 0.323 | | - |
|  | **β (95% CI)** | **p-value** | **β (95% CI)** | **p-value** | | **Lean soft tissue mass (kg)** |
| **Grains** | 0.22 (-0.66, 1.10) | 0.624 | 0.16 (-0.72, 1.04) | 0.722 | | - |
| **Vegetables** | -0.77 (-1.69, 0.15) | 0.101 | -0.45 (-1.42, 0.51) | 0.352 | | - |
| **Potatoes** | -0.09 (-0.75, 0.56) | 0.778 | 0.06 (-0.61, 0.73) | 0.863 | | - |
| **Fruit** | 0.31 (-0.57, 1.20) | 0.489 | 0.50 (-0.38, 1.39) | 0.264 | | - |
| **Dairy** | 0.05 (-1.03, 1.12) | 0.930 | 0.13 (-1.02, 1.29) | 0.817 | | - |
| **Fish** | 0.11 (-0.52, 0.73) | 0.734 | 0.14 (-0.49, 0.76) | 0.668 | | - |
| **Poultry** | 0.31 (-0.44, 1.07) | 0.415 | 0.38 (-0.39, 1.15) | 0.333 | | - |
| **Red Meat** | 0.62 (-0.02, 1.26) | 0.059 | 0.49 (-0.17, 1.15) | 0.143 | | - |
| **Legumes** | 0.26 (-0.59, 1.11) | 0.541 | 0.32 (-0.59, 1.23) | 0.487 | | - |
|  | **β (95% CI)** | **p-value** | **β (95% CI)** | **p-value** | | **Percentage body fat (%)** |
| **Grains** | 0.23 (-0.29, 0.76) | 0.384 | 0.18 (-0.35, 0.70) | 0.505 | | - |
| **Vegetables** | -0.05 (-0.60, 0.51) | 0.858 | 0.08 (-0.50, 0.66) | 0.796 | | - |
| **Potatoes** | -0.06 (-0.45, 0.33) | 0.754 | -0.08 (-0.48, 0.32) | 0.697 | | - |
| **Fruit** | 0.08 (-0.45, 0.61) | 0.767 | 0.12 (-0.41, 0.66) | 0.647 | | - |
| **Dairy** | -0.29 (-0.93, 0.35) | 0.372 | -0.31 (-1.00, 0.38) | 0.379 | | - |
| **Fish** | -0.16 (-0.53, 0.21) | 0.390 | -0.13 (-0.51, 0.24) | 0.479 | | - |
| **Poultry** | -0.10 (-0.56, 0.35) | 0.661 | -0.09 (-0.56, 0.37) | 0.698 | | - |
| **Red Meat** | -0.16 (-0.54, 0.23) | 0.415 | -0.18 (-0.58, 0.22) | 0.365 | | - |
| **Legumes** | 0.26 (-0.24, 0.77) | 0.304 | 0.22 (-0.32, 0.76) | 0.424 | | - |
|  | **β (95% CI)** | **p-value** | **β (95% CI)** | **p-value** | | **VFAT mass (g)** |
| **Grains** | 7.01 (-36.68, 50.71) | 0.751 | -0.15 (-44.41, 44.11) | 0.995 | | - |
| **Vegetables** | -9.82 (-56.05, 36.41) | 0.672 | -4.48 (-53.11, 44.16) | 0.855 | | - |
| **Potatoes** | 0.29 (-32.41, 32.98) | 0.982 | 0.98 (-32.79, 34.74) | 0.954 | | - |
| **Fruit** | -13.77 (-57.76, 30.21) | 0.539 | -8.56 (-53.35, 36.22) | 0.705 | | - |
| **Dairy** | 0.34 (-53.12, 53.80) | 0.994 | -5.13 (-63.09, 52.82) | 0.861 | | - |
| **Fish** | -7.61 (-50.10, 34.88) | 0.723 | 3.08 (-28.41, 34.58) | 0.847 | | - |
| **Poultry** | -10.45 (-55.55, 34.65) | 0.646 | 9.19 (-29.81, 48.19) | 0.641 | | - |
| **Red Meat** | -15.51 (-54.33, 23.31) | 0.433 | 8.39 (-25.02, 41.81) | 0.619 | | - |
| **Legumes** | 0.26 (-24.10, 77.09) | 0.983 | 13.60 (-32.10, 59.30) | 0.556 | | - |
|  | **β (95% CI)** | **p-value** | **β (95% CI)** | **p-value** | | **ALM** |
| **Grains** | 0.15 (-0.24, 0.54) | 0.44 | 0.138 (-0.255, 0.532) | 0.487 | | - |
| **Vegetables** | -0.30 (-0.71, 0.10) | 0.14 | -0.171 (-0.604, 0.261) | 0.434 | | - |
| **Potatoes** | -0.00 (-0.29, 0.29) | 0.99 | 0.064 (-0.237, 0.365) | 0.673 | | - |
| **Fruit** | 0.17 (-0.22, 0.56) | 0.39 | 0.240 (-0.157, 0.637) | 0.233 | | - |
| **Dairy** | -0.06 (-0.54, 0.41) | 0.80 | 0.055 (-0.461, 0.572) | 0.832 | | - |
| **Fish** | 0.01 (-0.27, 0.28) | 0.96 | 0.036 (-0.245, 0.317) | 0.800 | | - |
| **Poultry** | 0.07 (-0.27, 0.40) | 0.70 | 0.075 (-0.273, 0.422) | 0.672 | | - |
| **Red Meat** | 0.22 (-0.07, 0.50) | 0.13 | 0.157 (-0.139, 0.454) | 0.295 | | - |
| **Legumes** | 0.07 (-0.30, 0.45) | 0.70 | 0.092 (-0.316, 0.500) | 0.655 | | - |
| **Anthropometric outcomes** | | | | | | |
|  | **β (95% CI)** | **p-value** | **β (95% CI)** | | **p-value** | **Weight (kg)** |
| **Grains** | 0.98 (-1.01, 2.96) | 0.330 | 0.76 (-1.18, 2.69) | | 0.439 | - |
| **Vegetables** | -1.45 (-3.54, 0.64) | 0.173 | -0.54 (-2.67, 1.59) | | 0.613 | - |
| **Potatoes** | -0.29 (-1.78, 1.20) | 0.703 | -0.03 (-1.51, 1.45) | | 0.971 | - |
| **Fruit** | 0.89 (-1.11, 2.89) | 0.381 | 1.32 (-0.62, 3.27) | | 0.181 | - |
| **Dairy** | -0.18 (-2.62, 2.26) | 0.884 | 0.09 (-2.45, 2.63) | | 0.946 | - |
| **Fish** | -0.19 (-1.60, 1.22) | 0.788 | -0.04 (-1.42, 1.34) | | 0.950 | - |
| **Poultry** | 0.27 (-1.44, 1.99) | 0.751 | 0.37 (-1.34, 2.08) | | 0.668 | - |
| **Legumes** | 1.01 (-0.92, 2.93) | 0.302 | 0.41 (-1.06, 1.87) | | 0.584 | - |
| **Red Meat** | 0.71 (-0.76, 2.18) | 0.340 | 1.01 (-0.99, 3.00) | | 0.319 | - |
| **Legumes** | 1.01 (-0.92, 2.93) | 0.302 | 0.76 (-1.18, 2.69) | | 0.439 | - |
|  | **β (95% CI)** | **p-value** | **β (95% CI)** | | **p-value** | **BMI (kg/m2)** |
| **Grains** | 0.09 (-0.54, 0.71) | 0.787 | 0.03 (-0.59, 0.64) | | 0.933 | - |
| **Vegetables** | -0.48 (-1.14, 0.17) | 0.147 | -0.22 (-0.89, 0.45) | | 0.519 | - |
| **Potatoes** | -0.16 (-0.63, 0.31) | 0.495 | -0.11 (-0.57, 0.36) | | 0.656 | - |
| **Fruit** | 0.25 (-0.38, 0.88) | 0.436 | 0.31 (-0.30, 0.93) | | 0.315 | - |
| **Dairy** | -0.03 (-0.80, 0.73) | 0.930 | 0.12 (-0.68, 0.92) | | 0.767 | - |
| **Fish** | -0.10 (-0.54, 0.34) | 0.648 | -0.06 (-0.50, 0.37) | | 0.768 | - |
| **Poultry** | 0.07 (-0.47, 0.61) | 0.793 | 0.02 (-0.52, 0.56) | | 0.931 | - |
| **Red Meat** | -0.06 (-0.52, 0.41) | 0.806 | -0.18 (-0.64, 0.28) | | 0.430 | - |
| **Legumes** | 0.30 (-0.30, 0.91) | 0.324 | 0.29 (-0.34, 0.92) | | 0.363 | - |
|  | **β (95% CI)** | **p-value** | **β (95% CI)** | | **p-value** | **WHR** |
| **Grains** | -0.0004 (-0.0072, 0.0063) | 0.895 | -0.0002 (-0.0071, 0.0067) | | 0.958 | - |
| **Vegetables** | -0.0021 (-0.0093, 0.0050) | 0.556 | -0.0020 (-0.0096, 0.0056) | | 0.602 | - |
| **Potatoes** | -0.0012 (-0.0062, 0.0039) | 0.651 | -0.0013 (-0.0066, 0.0039) | | 0.616 | - |
| **Fruit** | -0.0036 (-0.0104, 0.0032) | 0.296 | -0.0035 (-0.0105, 0.0034) | | 0.316 | - |
| **Dairy** | 0.0022 (-0.0060, 0.0105) | 0.589 | 0.0047 (-0.0043, 0.0137) | | 0.299 | - |
| **Fish** | -0.0048 (-0.0095, -0.0002) | **0.043** | -0.0053 (-0.0101, -0.0005) | | **0.030** | **↓** |
| **Poultry** | -0.0029 (-0.0087, 0.0028) | 0.317 | -0.0027 (-0.0088, 0.0034) | | 0.380 | - |
| **Red Meat** | 0.0003 (-0.0047, 0.0053) | 0.907 | 0.0008 (-0.0044, 0.0060) | | 0.756 | - |
| **Legumes** | -0.0022 (-0.0087, 0.0043) | 0.509 | -0.0017 (-0.0088, 0.0054) | | 0.639 | - |
|  | **β (95% CI)** | **p-value** | **β (95% CI)** | | **p-value** | **WC (cm)** |
| **Grains** | 0.0075 (-0.0095, 0.0244) | 0.383 | 0.0056 (-0.0109, 0.0221) | | 0.504 | - |
| **Vegetables** | -0.0085 (-0.0264, 0.0094) | 0.348 | -0.0018 (-0.0199, 0.0164) | | 0.849 | - |
| **Potatoes** | -0.0035 (-0.0162, 0.0092) | 0.588 | -0.0021 (-0.0148, 0.0105) | | 0.736 | - |
| **Fruit** | 0.0060 (-0.0111, 0.0231) | 0.488 | 0.0089 (-0.0078, 0.0255) | | 0.295 | - |
| **Dairy** | 0.0015 (-0.0193, 0.0223) | 0.884 | 0.0047 (-0.0169, 0.0264) | | 0.665 | - |
| **Fish** | -0.0067 (-0.0186, 0.0053) | 0.272 | -0.0063 (-0.0180, 0.0054) | | 0.290 | - |
| **Poultry** | 0.0016 (-0.0130, 0.0162) | 0.825 | 0.0021 (-0.0125, 0.0167) | | 0.776 | - |
| **Red Meat** | -0.0020 (-0.0146, 0.0106) | 0.754 | -0.0038 (-0.0162, 0.0087) | | 0.553 | - |
| **Legumes** | 0.0114 (-0.0049, 0.0277) | 0.170 | 0.0113 (-0.0057, 0.0283) | | 0.189 | - |
| **Haemodynamic outcomes** | | | | | | |
|  | **β (95% CI)** | **p-value** | **β (95% CI)** | **p-value** | | **SBP (mmHg)** |
| **Grains** | 1.70 (-0.48, 3.89) | 0.125 | 1.689 (-0.541, 3.920) | 0.136 | | - |
| **Vegetables** | 2.43 (0.12, 4.74) | **0.039** | 2.555 (0.119, 4.991) | **0.040** | | **↑** |
| **Potatoes** | 0.17 (-1.49, 1.83) | 0.840 | 0.148 (-1.575, 1.872) | 0.865 | | - |
| **Fruit** | 1.51 (-0.70, 3.72) | 0.178 | 0.408 (-1.932, 2.749) | 0.734 | | - |
| **Dairy** | -1.75 (-4.43, 0.94) | 0.200 | 0.123 (-2.095, 2.341) | 0.912 | | - |
| **Fish** | -0.09 (-1.66, 1.47) | 0.905 | 0.321 (-1.987, 2.629) | 0.782 | | - |
| **Poultry** | -1.20 (-3.09, 0.68) | 0.209 | -0.255 (-2.585, 2.075) | 0.829 | | - |
| **Red Meat** | -0.37 (-2.02, 1.28) | 0.660 | 0.597 (-1.578, 2.772) | 0.592 | | - |
| **Legumes** | -0.03 (-2.16, 2.10) | 0.975 | 0.718 (-1.673, 3.109) | 0.555 | | - |
|  | **β (95% CI)** | **p-value** | **β (95% CI)** | **p-value** | | **DBP (mmHg)** |
| **Grains** | 1.28 (-0.16, 2.72) | 0.082 | 1.16 (-0.34, 2.66) | 0.128 | | - |
| **Vegetables** | 1.03 (-0.51, 2.58) | 0.189 | 1.36 (-0.29, 3.01) | 0.105 | | - |
| **Potatoes** | 0.52 (-0.57, 1.62) | 0.345 | 0.68 (-0.48, 1.83) | 0.247 | | - |
| **Fruit** | 1.02 (-0.45, 2.48) | 0.171 | 1.27 (-0.25, 2.78) | 0.100 | | - |
| **Dairy** | -1.36 (-3.13, 0.41) | 0.130 | -1.89 (-3.84, 0.06) | 0.057 | | - |
| **Fish** | 0.71 (-0.31, 1.73) | 0.172 | 0.73 (-0.34, 1.80) | 0.177 | | - |
| **Poultry** | -1.21 (-2.45, 0.03) | 0.056 | -1.39 (-2.71, -0.08) | **0.037** | | **↓** |
| **Red Meat** | -0.06 (-1.15, 1.03) | 0.911 | -0.19 (-1.35, 0.96) | 0.739 | | - |
| **Legumes** | -0.12 (-1.53, 1.29) | 0.869 | -0.24 (-1.80, 1.32) | 0.765 | | - |
| **Biochemical outcomes** | | | | | | |
|  | **β (95% CI)** | **p-value** | **β (95% CI)** | **p-value** | | **Glucose (mmol/L)** |
| **Grains** | -0.108 (-0.293, 0.077) | 0.249 | -0.08 (-0.24, 0.09) | 0.341 | | - |
| **Vegetables** | -0.022 (-0.218, 0.175) | 0.826 | 0.02 (-0.17, 0.20) | 0.864 | | - |
| **Potatoes** | -0.002 (-0.141, 0.137) | 0.982 | 0.02 (-0.10, 0.15) | 0.737 | | - |
| **Fruit** | -0.064 (-0.251, 0.122) | 0.496 | -0.06 (-0.23, 0.10) | 0.444 | | - |
| **Dairy** | -0.169 (-0.394, 0.056) | 0.139 | -0.14 (-0.35, 0.08) | 0.215 | | - |
| **Fish** | -0.053 (-0.184, 0.078) | 0.425 | -0.05 (-0.17, 0.07) | 0.402 | | - |
| **Poultry** | 0.029 (-0.130, 0.189) | 0.717 | 0.05 (-0.10, 0.19) | 0.506 | | - |
| **Red Meat** | -0.092 (-0.228, 0.045) | 0.186 | -0.11 (-0.23, 0.02) | 0.086 | | - |
| **Legumes** | -0.022 (-0.202, 0.157) | 0.805 | -0.02 (-0.19, 0.15) | 0.823 | | - |
|  | **β (95% CI)** | **p-value** | **β (95% CI)** | **p-value** | | **HbA1c (mmol/mol)** |
| **Grains** | -0.017 (-0.108, 0.075) | 0.719 | -0.01 (-0.08, 0.07) | 0.889 | | - |
| **Vegetables** | -0.018 (-0.115, 0.079) | 0.707 | 0.02 (-0.06, 0.11) | 0.602 | | - |
| **Potatoes** | -0.016 (-0.084, 0.053) | 0.649 | 0.00 (-0.05, 0.06) | 0.897 | | - |
| **Fruit** | -0.010 (-0.102, 0.083) | 0.832 | -0.01 (-0.09, 0.07) | 0.841 | | - |
| **Dairy** | -0.089 (-0.200, 0.022) | 0.115 | -0.06 (-0.16, 0.04) | 0.217 | | - |
| **Fish** | -0.001 (-0.066, 0.064) | 0.982 | -0.00 (-0.06, 0.05) | 0.953 | | - |
| **Poultry** | 0.051 (-0.027, 0.130) | 0.197 | 0.05 (-0.02, 0.11) | 0.173 | | - |
| **Red Meat** | -0.025 (-0.092, 0.043) | 0.474 | -0.04 (-0.10, 0.02) | 0.171 | | - |
| **Legumes** | -0.015 (-0.104, 0.073) | 0.733 | -0.01 (-0.09, 0.07) | 0.763 | | - |
|  | **β (95% CI)** | **p-value** | **β (95% CI)** | **p-value** | | **Insulin (µU /mL)** |
| **Grains** | -0.085 (-1.063, 0.892) | 0.863 | -0.03 (-0.91, 0.85) | 0.954 | | - |
| **Vegetables** | -1.033 (-2.050, -0.016) | **0.046** | -0.77 (-1.73, 0.18) | 0.111 | | **↓** |
| **Potatoes** | -0.338 (-1.066, 0.391) | 0.360 | -0.12 (-0.79, 0.55) | 0.729 | | - |
| **Fruit** | -0.548 (-1.528, 0.433) | 0.271 | -0.31 (-1.20, 0.58) | 0.497 | | - |
| **Dairy** | -0.895 (-2.079, 0.289) | 0.137 | -0.37 (-1.52, 0.78) | 0.528 | | - |
| **Fish** | 0.083 (-0.608, 0.774) | 0.813 | 0.06 (-0.57, 0.68) | 0.858 | | - |
| **Poultry** | -0.540 (-1.374, 0.295) | 0.203 | -0.30 (-1.08, 0.47) | 0.442 | | - |
| **Red Meat** | 0.097 (-0.628, 0.822) | 0.791 | 0.03 (-0.64, 0.69) | 0.932 | | - |
| **Legumes** | -0.348 (-1.293, 0.596) | 0.467 | -0.38 (-1.29, 0.53) | 0.409 | | - |
|  | **β (95% CI)** | **p-value** | **β (95% CI)** | **p-value** | | **HOMA-IR** |
| **Grains** | -0.138 (-0.500, 0.224) | 0.452 | -0.10 (-0.42, 0.22) | 0.546 | | - |
| **Vegetables** | -0.311 (-0.691, 0.069) | 0.107 | -0.22 (-0.57, 0.13) | 0.218 | | - |
| **Potatoes** | -0.089 (-0.360, 0.182) | 0.517 | -0.02 (-0.26, 0.23) | 0.898 | | - |
| **Fruit** | -0.170 (-0.535, 0.195) | 0.358 | -0.05 (-0.28, 0.19) | 0.673 | | - |
| **Dairy** | -0.306 (-0.746, 0.135) | 0.172 | -0.15 (-0.40, 0.11) | 0.261 | | - |
| **Fish** | 0.009 (-0.247, 0.266) | 0.943 | -0.03 (-0.20, 0.15) | 0.760 | | - |
| **Poultry** | -0.117 (-0.428, 0.195) | 0.460 | -0.11 (-0.31, 0.09) | 0.274 | | - |
| **Red Meat** | -0.022 (-0.291, 0.247) | 0.872 | -0.01 (-0.22, 0.20) | 0.934 | | - |
| **Legumes** | -0.120 (-0.471, 0.231) | 0.500 | -0.09 (-0.32, 0.14) | 0.446 | | - |
|  | **β (95% CI)** | **p-value** | **β (95% CI)** | **p-value** | | **Cholesterol (mmol/L)** |
| **Grains** | -0.120 (-0.280, 0.040) | 0.139 | -0.15 (-0.31, 0.01) | 0.060 | | - |
| **Vegetables** | 0.130 (-0.040, 0.299) | 0.132 | 0.14 (-0.04, 0.31) | 0.129 | | - |
| **Potatoes** | 0.056 (-0.064, 0.176) | 0.359 | 0.07 (-0.05, 0.19) | 0.273 | | - |
| **Fruit** | -0.062 (-0.225, 0.100) | 0.448 | -0.04 (-0.21, 0.12) | 0.596 | | - |
| **Dairy** | 0.005 (-0.192, 0.203) | 0.956 | 0.00 (-0.21, 0.22) | 0.971 | | - |
| **Fish** | -0.018 (-0.132, 0.096) | 0.754 | -0.02 (-0.14, 0.09) | 0.727 | | - |
| **Poultry** | 0.126 (-0.011, 0.263) | 0.071 | 0.13 (-0.01, 0.27) | 0.073 | | - |
| **Red Meat** | 0.077 (-0.042, 0.196) | 0.201 | 0.09 (-0.03, 0.21) | 0.145 | | - |
| **Legumes** | 0.015 (-0.142, 0.171) | 0.851 | -0.04 (-0.21, 0.13) | 0.617 | | - |
|  | **β (95% CI)** | **p-value** | **β (95% CI)** | **p-value** | | **Triglycerides (mmol/L)** |
| **Grains** | 0.031 (-0.057, 0.119) | 0.489 | 0.03 (-0.06, 0.13) | 0.446 | | - |
| **Vegetables** | -0.024 (-0.117, 0.070) | 0.617 | -0.03 (-0.13, 0.07) | 0.540 | | - |
| **Potatoes** | 0.019 (-0.048, 0.085) | 0.581 | 0.02 (-0.05, 0.09) | 0.543 | | - |
| **Fruit** | -0.066 (-0.155, 0.022) | 0.141 | -0.07 (-0.16, 0.02) | 0.148 | | - |
| **Dairy** | -0.028 (-0.136, 0.080) | 0.609 | -0.01 (-0.13, 0.11) | 0.881 | | - |
| **Fish** | -0.023 (-0.083, 0.037) | 0.457 | -0.03 (-0.10, 0.03) | 0.325 | | - |
| Poultry | 0.001 (-0.076, 0.077) | 0.989 | 0.02 (-0.06, 0.10) | 0.697 | | - |
| Red Meat | -0.001 (-0.067, 0.064) | 0.965 | -0.01 (-0.08, 0.06) | 0.757 | | - |
| Legumes | 0.006 (-0.080, 0.092) | 0.891 | -0.01 (-0.10, 0.08) | 0.817 | | - |
|  | **β (95% CI)** | **p-value** | **β (95% CI)** | **p-value** | | **HDL (mmol/L)** |
| **Grains** | -0.022 (-0.067, 0.023) | 0.333 | -0.02 (-0.06, 0.02) | 0.328 | | - |
| **Vegetables** | 0.046 (-0.001, 0.093) | **0.054** | 0.03 (-0.02, 0.07) | 0.267 | | **↑** |
| **Potatoes** | 0.019 (-0.014, 0.053) | 0.262 | 0.01 (-0.02, 0.05) | 0.427 | | - |
| **Fruit** | 0.012 (-0.033, 0.058) | 0.594 | 0.00 (-0.04, 0.05) | 0.867 | | - |
| **Dairy** | 0.012 (-0.043, 0.067) | 0.661 | 0.01 (-0.05, 0.07) | 0.765 | | - |
| **Fish** | 0.004 (-0.028, 0.036) | 0.808 | -0.00 (-0.03, 0.03) | 0.885 | | - |
| **Poultry** | 0.047 (0.010, 0.085) | **0.014** | 0.05 (0.01, 0.08) | **0.014** | | **↑** |
| **Red Meat** | 0.011 (-0.022, 0.045) | 0.504 | 0.02 (-0.02, 0.05) | 0.328 | | - |
| **Legumes** | 0.003 (-0.041, 0.047) | 0.889 | 0.00 (-0.04, 0.05) | 0.990 | | - |
|  | **β (95% CI)** | **p-value** | **β (95% CI)** | **p-value** | | **LDL (mmol/L)** |
| **Grains** | -0.109 (-0.248, 0.030) | 0.122 | -0.14 (-0.28, -0.01) | **0.042** | | **↓** |
| **Vegetables** | 0.102 (-0.045, 0.249) | 0.173 | 0.13 (-0.02, 0.28) | 0.096 | | - |
| **Potatoes** | 0.015 (-0.090, 0.120) | 0.774 | 0.03 (-0.08, 0.14) | 0.563 | | - |
| **Fruit** | -0.045 (-0.186, 0.097) | 0.532 | -0.02 (-0.16, 0.12) | 0.801 | | - |
| **Dairy** | 0.003 (-0.168, 0.175) | 0.969 | -0.00 (-0.18, 0.18) | 0.995 | | - |
| **Fish** | -0.016 (-0.116, 0.083) | 0.745 | -0.01 (-0.11, 0.09) | 0.798 | | - |
| **Poultry** | 0.081 (-0.038, 0.201) | 0.181 | 0.08 (-0.04, 0.20) | 0.208 | | - |
| **Red Meat** | 0.060 (-0.043, 0.164) | 0.249 | 0.07 (-0.03, 0.18) | 0.183 | | - |
| **Legumes** | 0.008 (-0.128, 0.144) | 0.908 | -0.04 (-0.18, 0.11) | 0.602 | | - |

a Model 1: adjusted for age and sex; b Model 2: adjusted for age, sex, moderate-to-vigorous physical activity, diabetes status. Abbreviations: β, regression coefficient; CI, confidence interval; SBP, systolic blood pressure; DBP, diastolic blood pressure; WHR, waist-to-hip ratio; BMI, body mass index; WC, waist circumference; VFAT, visceral fat mass; TG, triglycerides; HDL, high-density lipoprotein; LDL, low-density lipoprotein; HOMA-IR, homeostatic model assessment for insulin resistance; HbA1c, glycated haemoglobin A1C; ALM, appendicular lean mass.
